# Supplementary material for: Oxygen Deprivation Modulates EGFR and PD-L1 in Squamous Cell Carcinomas of the Head and Neck
Source: PubMed Central journal article supplement (PMC7953989; doi:10.3389/fonc.2021.623964), 2021-02-26

**Supplementary Table S1**

| <b>Cell line</b> | <b>Origin</b>                         | <b>p53 status</b>                                                                                                                                                                                                                |                                                                        |
|------------------|---------------------------------------|----------------------------------------------------------------------------------------------------------------------------------------------------------------------------------------------------------------------------------|------------------------------------------------------------------------|
| <b>Cal-33</b>    | Squamous Cell Carcinoma (Tongue)      | Established from the surgically removed fragment of a tongue lesion from a 69-year-old man with moderately differentiated squamous cell carcinoma of the tongue in 1983 (prior to therapy).<br>DOI: 10.1016/0277-5379(88)90335-5 | Mut. (R175H)                                                           |
| <b>SCC-9</b>     | Squamous Cell Carcinoma (Tongue)      | Established from a tongue squamous cell carcinoma of a 25-year-old caucasian man                                                                                                                                                 | c.822_853del32                                                         |
| <b>SCC-131</b>   | Squamous Cell Carcinoma (oral cavity) | Established from an oral squamous cell carcinoma of a 73-year-old caucasian man                                                                                                                                                  | Tyr205Ser (c.614A>C)                                                   |
| <b>FaDu</b>      | Squamous Cell Carcinoma (pharynx)     | Established in 1968 from a punch biopsy of an hypopharyngeal tumor removed from a 56 year old caucasian man                                                                                                                      | c.376-1G>A and c.743G>T                                                |
| <b>SCC-263</b>   | Squamous Cell Carcinoma (oral cavity) | obtained from a biopsy from a head and neck tumor<br><br><a href="https://doi.org/10.1016/S0167-8140(01)00498-4">https://doi.org/10.1016/S0167-8140(01)00498-4</a>                                                               | R306X in exon 8 (CGA.TGA) and a 32-bp deletion in exon 7 (del 704–735) |
| <b>SCC-25</b>    | Squamous Cell Carcinoma (tongue)      | Established from a tumor removed from a 70 year old caucasian man.                                                                                                                                                               | c.625_626delA G                                                        |

**Supplementary Table S2**

| <b>Antigen</b> | <b>Primary AB<br/>(Cat.-No., clone,<br/>species, dilution,<br/>incubation)</b> | <b>Primary AB<br/>supplier</b>                        | <b>Fluorochrome<br/>(Cat.-No.)</b>      | <b>Staining<br/>pattern</b> |
|----------------|--------------------------------------------------------------------------------|-------------------------------------------------------|-----------------------------------------|-----------------------------|
| <b>EGFR</b>    | 4267, D38B1,<br>rabbit, 1:50,<br>overnight at 4°C                              | Cell Signaling<br>Technology,<br>Danvers, MA<br>(USA) | Alexa Fluor 647<br>Tyramide<br>(T20951) | Membranous                  |
| <b>CA IX</b>   | ab108351,<br>EPR4151[2],<br>rabbit, 1 : 200, 1 h<br>at 28 - 30°C               | Epitomics,<br>Burlingame, CA<br>(USA)                 | Alexa Fluor 488<br>Tyramide<br>(T20948) | Membranous                  |
| <b>CD34</b>    | ab81289,<br>EP373Y, rabbit,<br>1:150, for 1 h at<br>24°C                       | Abcam,<br>Cambridge (UK)                              | Alexa Fluor 546<br>Tyramide<br>(T20923) | Membranous                  |

# Supplementary Figure S1

## A

### SCC-9

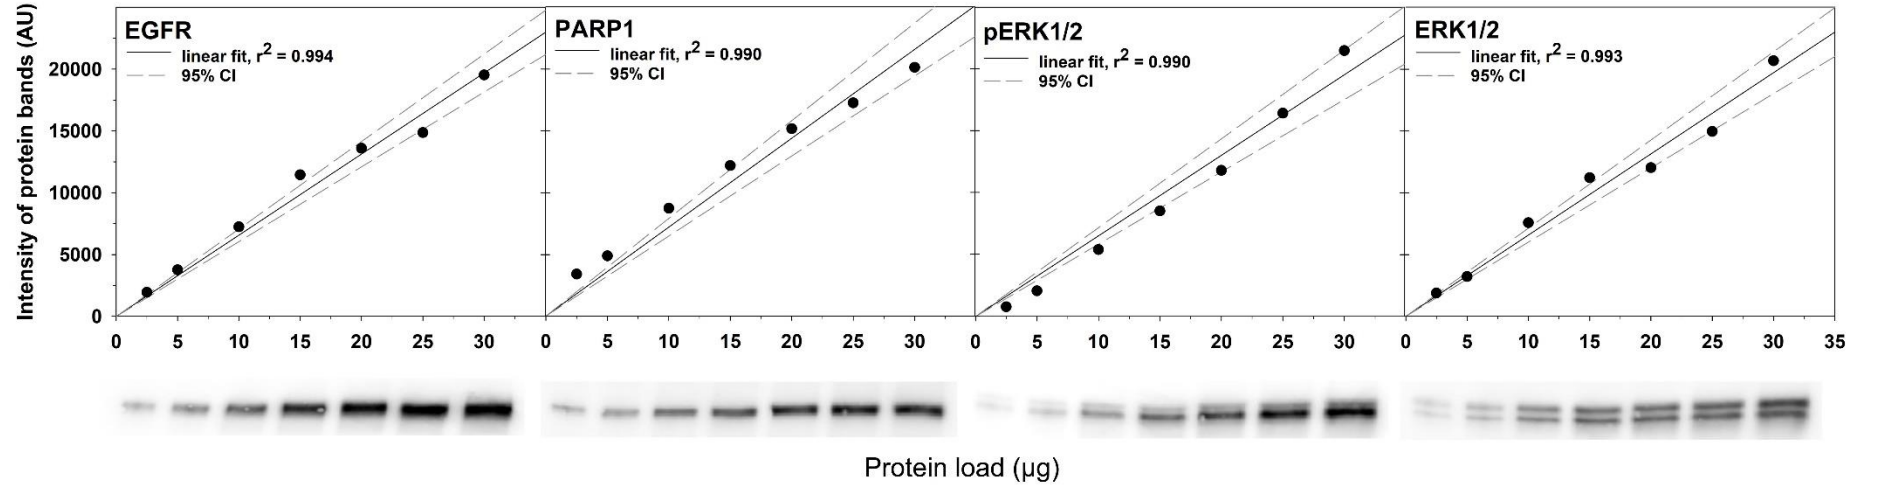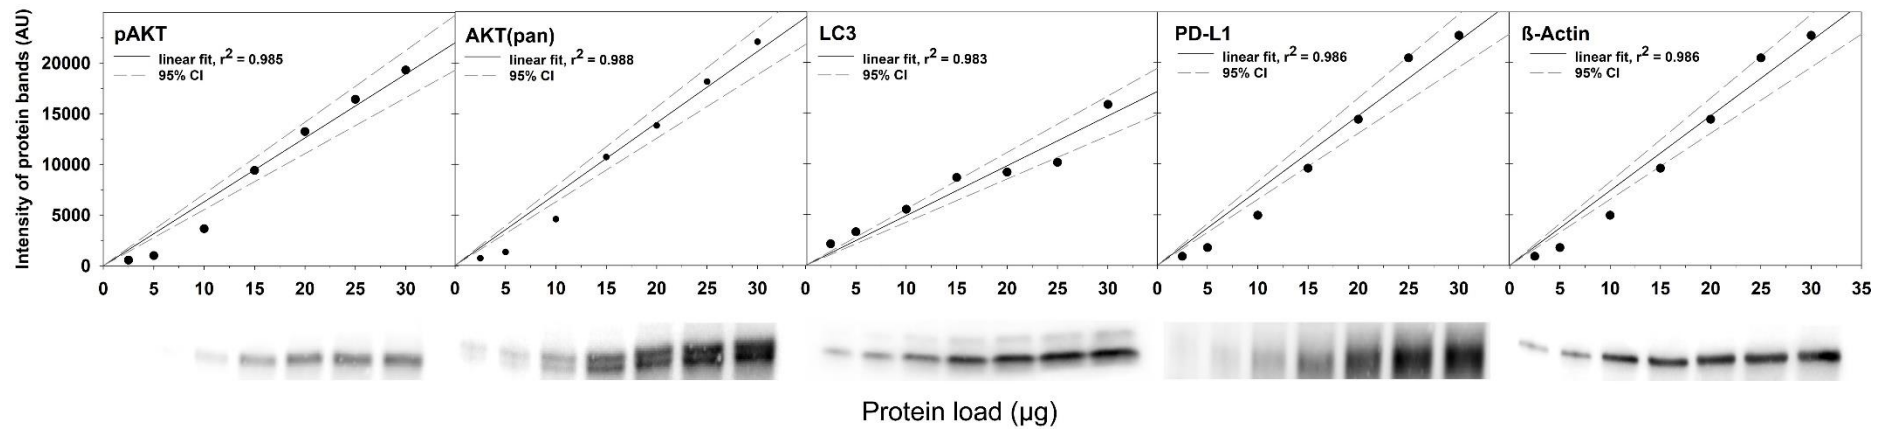

**B****FaDu**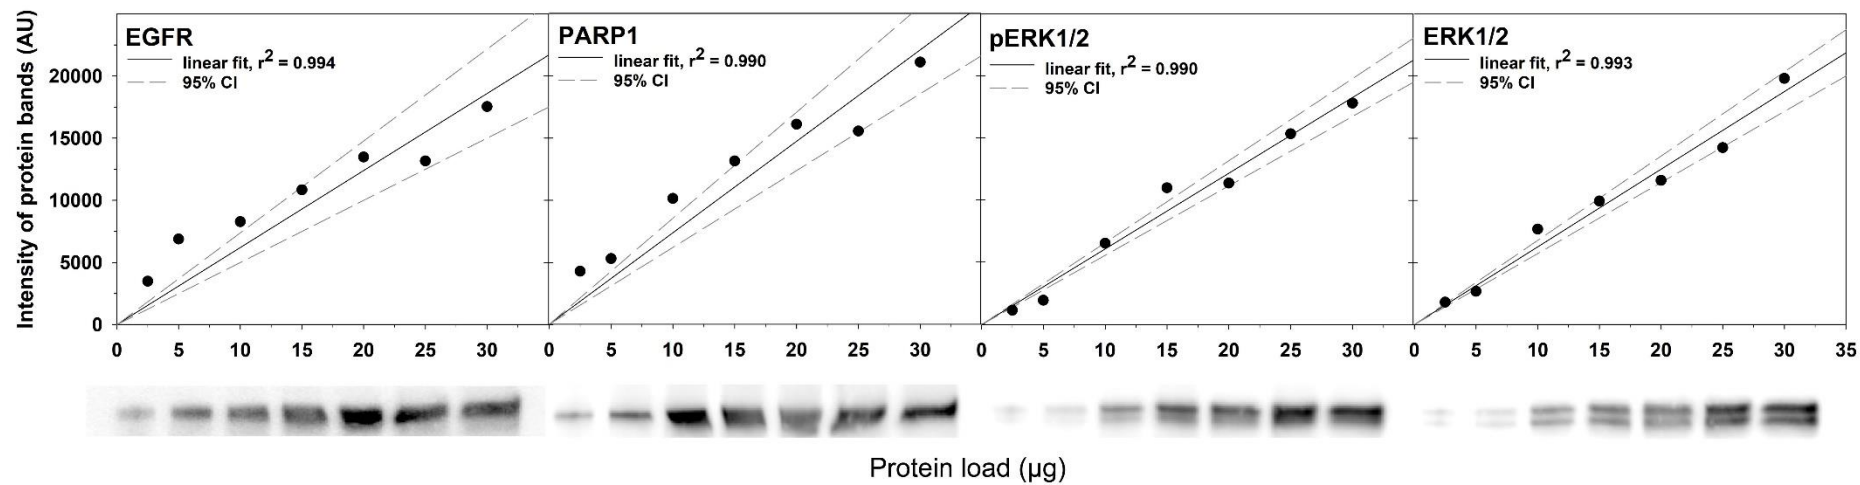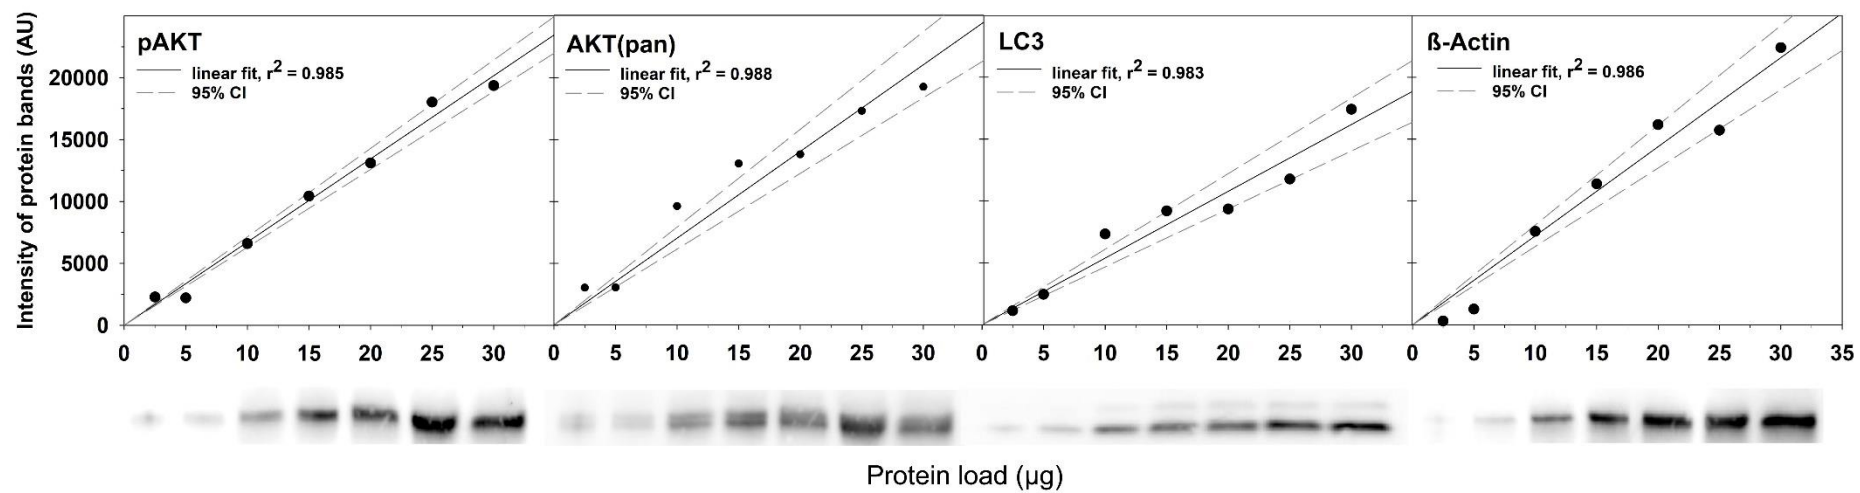

**C****SCC-131**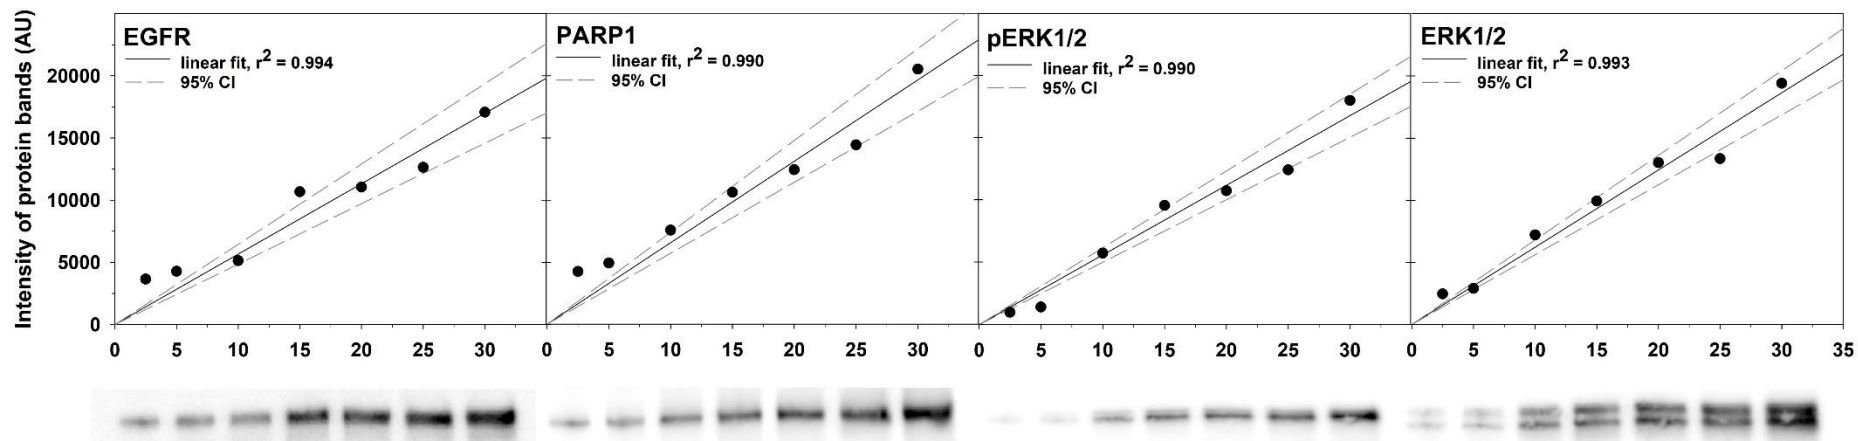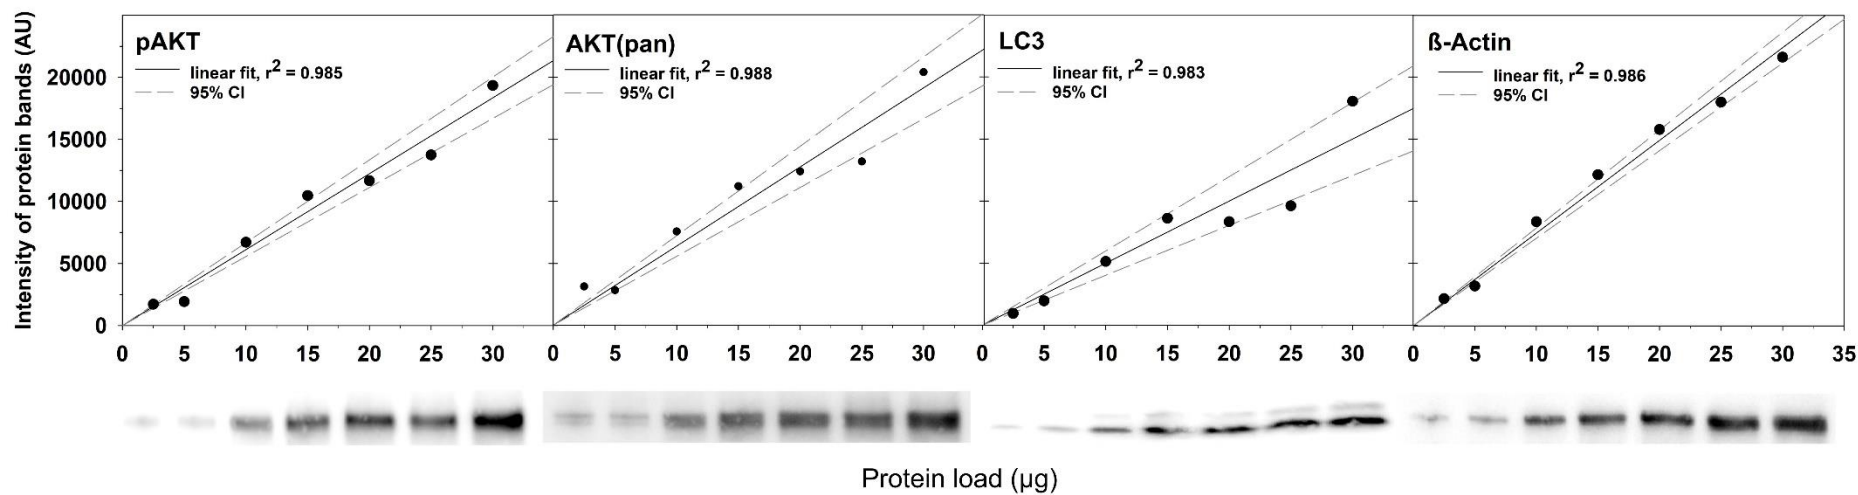

## Supplementary Figure S2

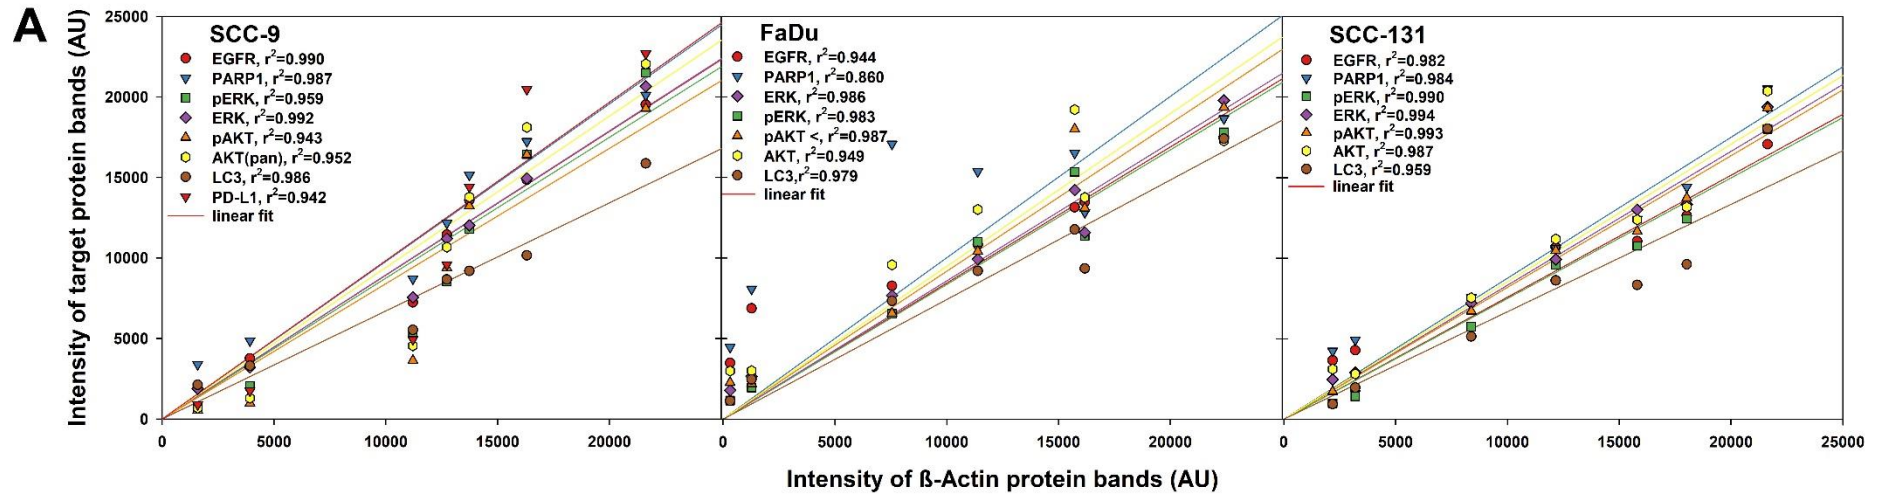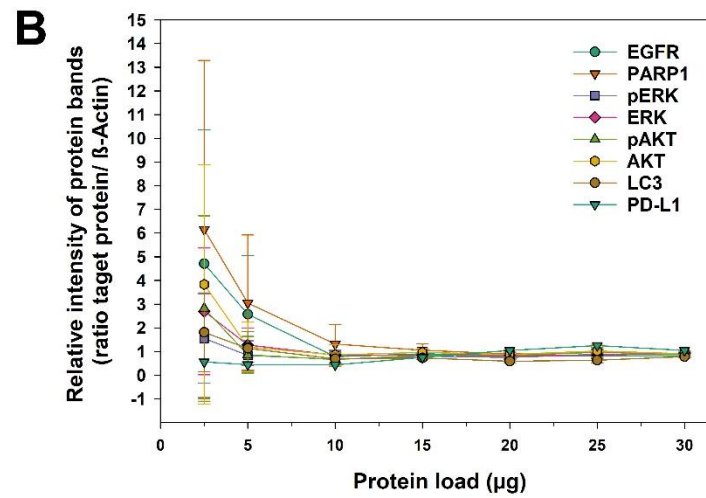

Supplement: DataSheet_1.pdf [file DataSheet_1.pdf]
